# Supplementary material for: CSPG4: A Target for Selective Delivery of Human Cytolytic Fusion Proteins and TRAIL
Source: MDPI journal article supplement (doi:10.3390/biomedicines5030037), 2017-06-28
Supplement: s1 [file s1]

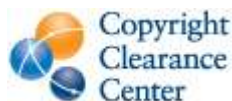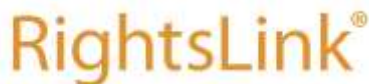
[Home](#)
[Account Info](#)
[Help](#)
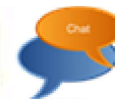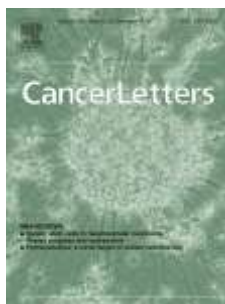

**Title:** A CSPG4-specific immunotoxin kills rhabdomyosarcoma cells and binds to primary tumor tissues

**Author:** Hannes Brehm, Judith Niesen, Radoslav Mladenov, Christoph Stein, Alessa Pardo, Georg Fey, Wijnand Helfrich, Rainer Fischer, Stefan Gattenlöhner, Stefan Barth

Logged in as:  
Stefan Barth  
University of Cape Town

[LOGOUT](#)

**Publication:** Cancer Letters

**Publisher:** Elsevier

**Date:** 1 October 2014

Copyright © 2014 Elsevier Ireland Ltd. All rights reserved.

## Order Completed

Thank you for your order.

This Agreement between University of Cape Town -- Stefan Barth ("You") and Elsevier ("Elsevier") consists of your license details and the terms and conditions provided by Elsevier and Copyright Clearance Center.

Your confirmation email will contain your order number for future reference.

### [Printable details.](#)

|                                                 |                                                                                                                                                               |
|-------------------------------------------------|---------------------------------------------------------------------------------------------------------------------------------------------------------------|
| License Number                                  | 4133651242280                                                                                                                                                 |
| License date                                    | Jun 21, 2017                                                                                                                                                  |
| Licensed Content Publisher                      | Elsevier                                                                                                                                                      |
| Licensed Content Publication                    | Cancer Letters                                                                                                                                                |
| Licensed Content Title                          | A CSPG4-specific immunotoxin kills rhabdomyosarcoma cells and binds to primary tumor tissues                                                                  |
| Licensed Content Author                         | Hannes Brehm, Judith Niesen, Radoslav Mladenov, Christoph Stein, Alessa Pardo, Georg Fey, Wijnand Helfrich, Rainer Fischer, Stefan Gattenlöhner, Stefan Barth |
| Licensed Content Date                           | Oct 1, 2014                                                                                                                                                   |
| Licensed Content Volume                         | 352                                                                                                                                                           |
| Licensed Content Issue                          | 2                                                                                                                                                             |
| Licensed Content Pages                          | 8                                                                                                                                                             |
| Type of Use                                     | reuse in a journal/magazine                                                                                                                                   |
| Requestor type                                  | author of new work                                                                                                                                            |
| Intended publisher of new work                  | MDPI AG                                                                                                                                                       |
| Portion                                         | figures/tables/illustrations                                                                                                                                  |
| Number of figures/tables/illustrations          | 1                                                                                                                                                             |
| Format                                          | electronic                                                                                                                                                    |
| Are you the author of this Elsevier article?    | Yes                                                                                                                                                           |
| Will you be translating?                        | No                                                                                                                                                            |
| Order reference number                          |                                                                                                                                                               |
| Original figure numbers                         | Figure 2                                                                                                                                                      |
| Title of the article                            | CSPG4: A Target for Selective Delivery of Human Cytolytic Fusion Proteins and TRAIL                                                                           |
| Publication new article is in                   | Biomedicines                                                                                                                                                  |
| Publisher of the new article                    | MDPI AG                                                                                                                                                       |
| Author of new article                           | Sandra Jordaan                                                                                                                                                |
| Expected publication date                       | Jul 2017                                                                                                                                                      |
| Estimated size of new article (number of pages) | 16                                                                                                                                                            |
| Elsevier VAT number                             | GB 494 6272 12                                                                                                                                                |

|                    |                                                                                                                                                                                                       |
|--------------------|-------------------------------------------------------------------------------------------------------------------------------------------------------------------------------------------------------|
| Requestor Location | University of Cape Town<br>Rm N3.13, Wernher-Beit North<br>UCT Faculty of Health Sciences<br>Anzio Road, Observatory<br>Cape Town, Western Cape 7925<br>South Africa<br>Attn: University of Cape Town |
| Publisher Tax ID   | ZA 4110266048                                                                                                                                                                                         |
| Total              | 0.00 USD                                                                                                                                                                                              |

[ORDER MORE](#)[CLOSE WINDOW](#)

Copyright © 2017 [Copyright Clearance Center, Inc.](#) All Rights Reserved. [Privacy statement.](#) [Terms and Conditions.](#)  
Comments? We would like to hear from you. E-mail us at [customercare@copyright.com](mailto:customercare@copyright.com)
